# Supplementary material for: Coagulopathy is a major extrapulmonary risk factor for mortality in hospitalized patients with COVID-19 with type 2 diabetes
Source: PubMed Central journal article supplement — BMJ Open Diabetes Res Care. 2020 Nov 19;8(2):e001851. doi: 10.1136/bmjdrc-2020-001851 (PMC7677866; doi:10.1136/bmjdrc-2020-001851), 2020-11-19
Supplement: bmjdrc-2020-001851supp001.pdf [file bmjdrc-2020-001851supp001.pdf]

**Table S1 Laboratory characteristics in COVID-19 inpatients without and with****T2DM**

|                                           | All<br>(N=1105)            | Non-T2DM<br>(N=967)        | T2DM<br>(N=138)            | <i>p</i><br>value |
|-------------------------------------------|----------------------------|----------------------------|----------------------------|-------------------|
| <b>Hematologic</b>                        |                            |                            |                            |                   |
| White blood cells,<br>×10 <sup>9</sup> /L | 5.69 (4.18-8.22)           | 5.65 (4.145-8.2)           | 6.08 (4.53-8.62)           | 0.074             |
| Neutrophils, ×10 <sup>9</sup> /L          | 4.05 (2.60-6.77)           | 3.97 (2.55-6.60)           | 4.61 (3.21-7.49)           | 0.011             |
| Lymphocytes, ×10 <sup>9</sup> /L          | 0.98 (0.65-1.36)           | 1.00 (0.67-1.38)           | 0.82 (0.59-1.19)           | 0.001             |
| Monocytes, ×10 <sup>9</sup> /L            | 0.35 (0.25-0.48)           | 0.36 (0.25-0.48)           | 0.32 (0.22-0.48)           | 0.235             |
| Platelets, ×10 <sup>9</sup> /L            | 207.00 (152.00-<br>269.00) | 206.00 (152.00-<br>269.00) | 211.50 (150.75-<br>270.50) | 0.698             |
| CD3, /μL                                  | 602.00 (410.75-<br>846.00) | 611.00 (439.50-<br>890.25) | 367.00 (239.00-<br>627.00) | 0.028             |
| CD4, /μL                                  | 349.00 (223.75-<br>562.00) | 357.50 (234.00-<br>566.00) | 234.00 (166.00-<br>359.25) | 0.049             |
| CD8, /μL                                  | 222.00 (142.00-<br>315.00) | 234.00 (151.25-<br>319.50) | 115.00 (77.75-<br>154.00)  | 0.005             |
| <b>Biochemical</b>                        |                            |                            |                            |                   |
| Total bilirubin, μmol/L                   | 11.80 (9.30-<br>15.40)     | 11.80 (9.30-15.40)         | 12.20 (9.40-15.50)         | 0.962             |
| AST, U/L                                  | 33.00 (25.00-<br>33.00)    | 33.00 (25.00-<br>33.00)    | 34.00 (25.00-<br>34.00)    | 0.468             |

|                         |                       |                       |                       |            |
|-------------------------|-----------------------|-----------------------|-----------------------|------------|
|                         | 48.00)                | 47.00)                | 51.50)                |            |
| ALT, U/L                | 32.00 (19.00-51.00)   | 32.00 (19.00-51.00)   | 32.50 (21.00-46.00)   | 0.988      |
| Total protein, g/L      | 63.95 (60.10-68.20)   | 64.00 (60.43-68.20)   | 62.70 (59.13-68.00)   | 0.126      |
| Albumin, g/L            | 32.00 (28.95-35.15)   | 32.10 (29.20-35.40)   | 30.40 (27.00-34.00)   | <0.00<br>1 |
| Globulin, g/L           | 31.30 (28.80-34.70)   | 31.30 (28.70-34.60)   | 31.75 (29.20-36.03)   | 0.111      |
| Prealbumin, mg/L        | 129.00 (87.75-182.00) | 131.00 (88.00-189.50) | 121.00 (85.00-156.00) | 0.014      |
| Urea, mmol/L            | 4.60 (3.50-6.10)      | 4.50 (3.49-5.86)      | 5.75 (4.40-8.03)      | <0.00<br>1 |
| Creatinine, $\mu$ mol/L | 69.30 (57.50-82.10)   | 68.50 (57.20-81.00)   | 74.70 (60.90-96.00)   | <0.00<br>1 |
| Glucose, mmol/L         | 6.00 (5.10-7.80)      | 5.80 (5.10-7.20)      | 8.70 (6.23-13.38)     | <0.00<br>1 |
| hs-TnI, pg/mL           | 4.10 (1.60-11.78)     | 3.90 (1.40-10.23)     | 9.65 (2.90-30.90)     | <0.00<br>1 |
| CK-MB, U/L              | 13.00 (10.00-17.00)   | 13.00 (10.00-17.00)   | 15.00 (10.00-20.00)   | 0.014      |
| Cholinesterase, U/L     | 7674.00               | 7768.50 (6401.75-     | 6904.50 (5679.00-     | <0.00      |

|                                  |                             |                             |                             |            |
|----------------------------------|-----------------------------|-----------------------------|-----------------------------|------------|
|                                  | (6324.50-<br>8951.25)       | 9004.50)                    | 8741.00)                    | 1          |
| Cystatin C, mg/L                 | 0.87 (0.73-1.04)            | 0.85 (0.72-1.02)            | 1.01 (0.85-1.48)            | <0.00<br>1 |
| LDH, U/L                         | 285.00 (223.00-<br>390.00)  | 278.50 (221.00-<br>379.25)  | 329.00 (236.00-<br>451.50)  | 0.001      |
| $\alpha$ -HBDH, U/L              | 229.00 (181.50-<br>331.50)  | 226.00 (179.00-<br>319.00)  | 264.00 (207.00-<br>393.75)  | <0.00<br>1 |
| LDL, mmol/L                      | 2.18 (1.71-2.63)            | 2.23 (1.76-2.66)            | 1.81 (1.44-2.36)            | <0.00<br>1 |
| <b>Infection-related indices</b> |                             |                             |                             |            |
| hs-CRP, mg/L                     | 32.25 (6.90-<br>89.70)      | 29.70 (6.50-84.20)          | 55.30 (15.70-<br>129.10)    | <0.00<br>1 |
| IL-6, pg/mL                      | 8.41 (6.50-11.40)           | 8.45 (6.52-11.39)           | 8.19 (6.37-11.41)           | 0.920      |
| ESR, mm/h                        | 47.00 (31.00-<br>65.00)     | 47.00 (31.00-<br>65.00)     | 47.55 (34.00-<br>64.38)     | 0.999      |
| Serum ferritin, ng/mL            | 543.81 (301.85-<br>1053.61) | 525.09 (287.63-<br>1036.04) | 598.99 (360.07-<br>1268.70) | 0.025      |
| <b>Coagulation function</b>      |                             |                             |                             |            |
| PT, s                            | 11.30 (10.50-<br>12.20)     | 11.30 (10.50-12.10)         | 11.60 (10.80-<br>12.80)     | 0.001      |
| APTT, s                          | 26.70 (23.25-<br>30.25)     | 26.70 (23.20-<br>30.20)     | 27.00 (23.70-<br>30.30)     | 0.348      |

|                | 31.30)           | 31.20)           | 32.35)           |        |
|----------------|------------------|------------------|------------------|--------|
| D-dimer, µg/mL | 0.76 (0.44-1.91) | 0.73 (0.42-1.72) | 1.17 (0.55-4.22) | <0.001 |

---

T2DM, type 2 diabetes mellitus, IQR, interquartile range; N, cases with available data; s, second; ARDS, acute respiratory distress syndrome; AST, aspartate aminotransferase; ALT, Alanine aminotransferase; hs-TnI, high-sensitive troponin I; CK-MB, creatine kinase isoenzyme; LDH, lactate dehydrogenase;  $\alpha$ -HBDH,  $\alpha$ -hydroxybutyric dehydrogenase; LDL, low density lipoprotein; IL-6, interleukin-6; PT, prothrombin time; APTT, activated partial thromboplastin time; hs-CRP, creative reaction protein.
