# Supplementary material for: Coagulopathy is a major extrapulmonary risk factor for mortality in hospitalized patients with COVID-19 with type 2 diabetes
Source: PubMed Central journal article supplement — BMJ Open Diabetes Res Care. 2020 Nov 19;8(2):e001851. doi: 10.1136/bmjdrc-2020-001851 (PMC7677866; doi:10.1136/bmjdrc-2020-001851), 2020-11-19
Supplement: bmjdrc-2020-001851supp002.pdf [file bmjdrc-2020-001851supp002.pdf]

**Table S2 The hazard risk of T2DM for primary and secondary outcomes in****COVID-19 inpatients**

|                      | Univariate Cox model |                | Multivariate Cox model |                |
|----------------------|----------------------|----------------|------------------------|----------------|
|                      | HR (95%CI)           | <i>p</i> value | HR (95%CI)             | <i>p</i> value |
| Death                | 2.00 (1.45-2.75)     | <0.001         | 1.47 (1.04-2.08)       | 0.028          |
| ARDS                 | 1.63 (1.25-2.12)     | <0.001         | 1.37 (1.03-1.81)       | 0.029          |
| Acute cardiac injury | 2.43 (1.75-3.37)     | <0.001         | 1.50 (1.05-2.15)       | 0.025          |
| Acute liver injury   | 0.80 (0.10-6.33)     | 0.834          | 0.90 (0.11-7.56)       | 0.924          |
| Acute kidney injury  | 2.71 (1.82-4.04)     | <0.001         | 1.76 (1.14-2.71)       | 0.010          |
| Coagulopathy         | 2.28 (1.53-3.39)     | <0.001         | 1.58 (1.03-2.44)       | 0.036          |
| Hypoproteinemia      | 2.39 (1.57-3.63)     | <0.001         | 1.92 (1.23-3.02)       | 0.004          |

T2DM, type 2 diabetes mellitus; HR, hazard ratio; age, gender, comorbidities, and treatments were included in the multivariate Cox model.
