# Supplementary material for: Coagulopathy is a major extrapulmonary risk factor for mortality in hospitalized patients with COVID-19 with type 2 diabetes
Source: PubMed Central journal article supplement — BMJ Open Diabetes Res Care. 2020 Nov 19;8(2):e001851. doi: 10.1136/bmjdrc-2020-001851 (PMC7677866; doi:10.1136/bmjdrc-2020-001851), 2020-11-19

**Figure S1**

Temporal changes of D-dimer in coronavirus disease 2019 (COVID-19) hospitalized patients with pre-existing T2DM.

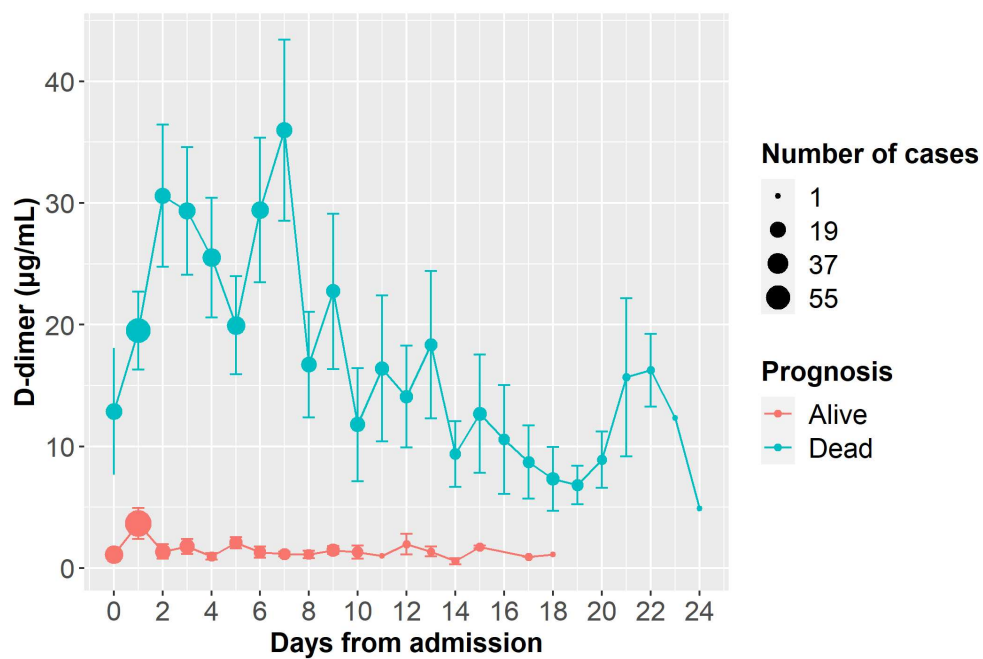

Supplement: bmjdrc-2020-001851supp003.pdf [file bmjdrc-2020-001851supp003.pdf]
